## 20 **Abstract**

21 IQSEC2 is an X-linked gene which is associated with autism spectrum disorder (ASD), intellectual  
22 disability and epilepsy. IQSEC2 is a postsynaptic density protein, localized on excitatory synapses as  
23 part of the NMDA receptor complex and is suggested to play a role in AMPA receptor trafficking and  
24 mediation of long-term depression. Here, we present brain-wide structural volumetric and functional  
25 connectivity characterization in a novel mouse model with a missense mutation in the IQ domain of  
26 IQSEC2 (A350V). Using high-resolution structural and functional MRI, we show that animals with the  
27 A350V mutation display increased whole-brain volume which was further found to be specific to the  
28 cortex and hippocampus. Moreover, using a data-driven approach we demonstrate that A350V mice  
29 present alterations in structure–function relations of the frontal, auditory, and visual networks.  
30 Examination of these alterations revealed an increase in functional connectivity between the anterior  
31 cingulate cortex and the dorsomedial striatum. We also show that corticostriatal functional connectivity  
32 is correlated with individual variability in social behavior only in A350V mice, as assessed using the  
33 three–chamber social preference test. Our results at the systems-level bridge the impact of previously  
34 reported changes in AMPA receptor trafficking to network-level disruption and impaired social  
35 behavior. Further, the A350V mouse model recapitulates similarly reported brain-wide changes in other  
36 ASD mouse models, with substantially different cellular-level pathologies that nonetheless result in  
37 similar brain-wide alterations, suggesting that novel therapeutic approaches in ASD that result in  
38 systems-level rescue will be relevant to IQSEC2 mutations.

## 39 **Significance Statement**

40 Several recent studies have characterized the changes in the organization of brain networks in animal  
41 models of autism spectrum disorders (ASD). Here we assessed the effect of an A350V missense  
42 mutation in the IQSEC2 gene, which is associated with ASD, on brain-wide functional connectivity and  
43 its relation to social behavior deficits in A350V mice relative to controls. We found that the A350V  
44 IQSEC2 model results in disrupted functional connectivity of the anterior cingulate cortex and the  
45 dorsomedial striatum. Critically, disrupted increased corticostriatal functional connectivity is predictive

46 of individual variability in social interaction only in A350V mice implicating this pathway in the  
47 pathophysiology of the A350V IQSEC2 mutation.

## 48 **Introduction**

49 Autism spectrum disorder (ASD) is a neurodevelopmental disorder with a highly genetically  
50 heterogeneous component (Geschwind and State, 2015; Takata et al., 2018). It is diagnosed on the basis  
51 of a combination of behavioral observations and clinical interviews that assess deficits in social  
52 interactions, communication and language, as well as repetitive and stereotyped behaviors (Elsabbagh  
53 et al., 2012), and is found to be associated with other cognitive and neurological conditions (Matson  
54 and Nebel-Schwalm, 2007; Mannion and Leader, 2013). Despite the complexity of ASD, genetic  
55 research has contributed significantly to the elucidation of its pathophysiology (Geschwind and State,  
56 2015). Research in genetically heterogeneous ASD populations has demonstrated converging  
57 pathophysiology, pointing out the role of glutamatergic cortical synapses in the pathology (Gilman et  
58 al., 2011; Parikshak et al., 2013). At the systems level, findings in human and genetic animal models  
59 have implicated disrupted brain-wide connectivity in ASD pathophysiology with diametrically different  
60 effects on distal versus local connectivity (Liska and Gozzi, 2016; Vasa et al., 2016).

61 Intrinsic functional connectivity MRI (fcMRI), the temporal correlation of spontaneous blood  
62 oxygenation level-dependent (BOLD) signal fluctuations in the brain, has been shown to be a useful  
63 method for characterization of brain networks in humans and animals (Fox and Raichle, 2007; Power  
64 et al., 2014b; Stafford et al., 2014; Zerbi et al., 2015; Bergmann et al., 2016). Several studies have  
65 demonstrated that fcMRI can be used to identify functional alterations in human diseases and in  
66 transgenic models in rodents (Buckner et al., 2009; Liska and Gozzi, 2016; Bertero et al., 2018; Shofty  
67 et al., 2019). Specifically, fcMRI studies in several ASD animal models have detected functional  
68 connectivity alterations that are consistent with electrophysiological recordings and human fcMRI  
69 studies (Scott-Van Zeeland et al., 2010; Peixoto et al., 2016; Liska et al., 2018; Pagani et al., 2019;  
70 Shofty et al., 2019).

71 IQSEC2, an X-linked gene coding for a protein found in the post synaptic density of  
72 glutamatergic synapses, has been implicated in trafficking of  $\alpha$ -amino-3-hydroxy-5-methyl-4-  
73 isoxazolepropionic acid (AMPA) receptors and regulation of synaptic transmission (Murphy et al.,  
74 2006; Brown et al., 2016; Petersen et al., 2018; Rogers et al., 2019). In humans, mutation in the IQSEC2

75 gene is associated with ASD, intellectual disabilities and epilepsy (Shoubridge et al., 2010; Kalscheuer  
76 et al., 2016; Zipper et al., 2017; Mignot et al., 2019). We recently described a new mouse model (Rogers  
77 et al., 2019) with a missense mutation in the IQ domain of IQSEC2 at amino acid residue 350 resulting  
78 in a valine for alanine substitution (A350V). The A350V mouse model was generated using CRISPR  
79 technology based on a human *de novo* mutation (Zipper et al., 2017) and demonstrated a significant  
80 reduction in the surface expression of GluA2 AMPA receptors in hippocampal neurons along with  
81 increased locomotion activity and abnormal social behavior, demonstrating that it manifests some of  
82 the abnormalities found in the human condition that inspired the generation of this mouse model.

83 Here, we investigated the impact of the A350V mutation on brain-wide structural and functional  
84 alterations using MRI. We examined the A350V mouse model using a structure–function analysis that  
85 allowed us to characterize putative changes in functional connectivity in a hypothesis-free data-driven  
86 approach. Further, we tested whether the observed functional connectivity alterations can explain  
87 behavioral variability, thereby linking functional connectivity changes to ASD-related behavioral  
88 impairments. By characterizing the discrepancies between structure–function relations and further  
89 investigating the altered regions, we found that the A350V mouse model presents increased  
90 corticostriatal functional connectivity which is linked to abnormal social behavior in the three-chamber  
91 sociability task.

## 92 **Materials and Methods**

### 93 **Ethics**

94 All animal experiments were conducted in accordance with the United States Public Health Service's  
95 Policy on Humane Care and Use of Laboratory Animals and approved by the Institutional Animal Care  
96 and Use Committee of the Technion – Israel Institute of Technology.

### 97 **Animals and housing conditions**

98 A350V IQSEC2 mice in a C57Bl/6J background were generated by CRISPR as previously described  
99 (Rogers et al., 2019). A350V IQSEC2 hemizygous male mice and male wild-type (WT) littermates  
100 were housed in groups of 2–5 animals per cage in a reversed 12 h light-dark cycle with food and water

101 available *ad libitum*. The housing room was maintained at  $23 \pm 2$  °C. All experiments were conducted  
102 during the dark phase.

### 103 **Experimental design**

104 The experimental protocol is presented in **Fig. 1**. Behavioral experiments were performed on 6–7-week-  
105 old mice in which all animals were tested for social preference ( $n_{WT} = 18$ ,  $n_{A350V} = 14$ ). A subset of the  
106 cohort then underwent a head-post surgery at 10–12 weeks of age and were allowed to recover for one  
107 week in their home cage. Two mice (one of each genotype) died during the surgery and therefore two  
108 additional mice, who did not participate in the behavioral experiments, were operated on, to replace  
109 these mice ( $n_{WT} = 13$ ,  $n_{A350V} = 13$ ). To reduce head movement during the fcMRI scans, mice were  
110 acclimatized to the head fixation position inside the scanner for four days prior to the first fcMRI scan.  
111 Thus, at 3–4 months of age the mice underwent 7–8 awake head-fixed fcMRI sessions (one session per  
112 day) which were followed with a single high-resolution structural imaging scan under anesthesia on the  
113 last fcMRI session.

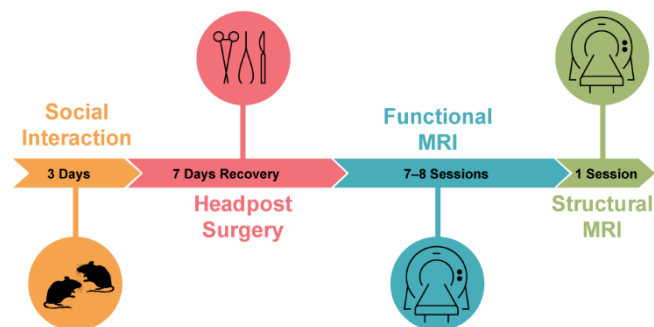

115 **Figure 1.** Experimental protocol. The timeline shows the sequence of experimental steps animals  
116 underwent. Social interaction assessment was examined on juvenile mice at 6–7 weeks of age. Then,  
117 at 10–12 weeks of age mice underwent a head-post surgery and recovered for seven days. After  
118 recovery, mice underwent a four days acclimatization period to awake head-fixed imaging followed by  
119 a 7–8 fcMRI sessions. Finally, a single structural MRI scan was acquired.

### 120 **Three-chamber sociability test**

121 Social interaction was measured in order to assess autistic-like behavior using the three-chamber test  
122 (Moy et al., 2004). Subject mice were assessed for the tendency to prefer an unfamiliar conspecific  
123 mouse (social stimulus; *Stranger 1*) over a novel object. Mice (subject and stimulus) were habituated  
124 to the testing room for three consecutive days prior to the test day for one hour. Stimulus mice were

125 further habituated to the wire cages (10.8 cm in height and 10.2 cm diameter at the bottom; Galaxy Cup,  
126 Spectrum Diversified Designs, Inc., Streetsboro, OH, USA) for 20 min each day. On the test day, subject  
127 mice were habituated to the apparatus ( $70 \times 29 \times 35 \text{ cm}^3$ ) for 10 min and were able to explore all three  
128 empty chambers. Time spent in each chamber was measured to assess chamber bias. Following  
129 habituation, subject mice were assessed for social preference for 10 min by allowing interaction with  
130 *Stranger 1* which was placed inside a wire cage in one chamber and a novel object which was placed  
131 inside an identical wire cage in the opposite chamber. Stimulus mice location was counterbalanced  
132 across trials to prevent chamber bias. Stimulus mice were conspecific C57BL/6 mice from different  
133 litters, and were age, sex and weight-matched to the subject mice and to each other.

134 Behavioral experiments were performed under red lighting conditions (<5 lux) by a single  
135 experimenter blind to the genotype of the animals. All experiments were video-recorded by a camera  
136 (GUPPY PRO F-125B CCD, Allied Vision Technologies, GmbH, Ahrensburg, Germany) located  
137 above the arena and analyzed post-hoc using Ethovision XT 10.1 software (Noldus, Wageningen, The  
138 Netherlands). The apparatus was cleaned after each trial with 70% ethanol and then with double-  
139 distilled water.

#### 140 **Head-post surgery**

141 To prepare for awake fMRI scanning, mice were implanted with MRI-compatible head-posts, as  
142 previously described (Bergmann et al., 2016). Briefly, mice were anesthetized with isoflurane (1.5–  
143 2.5%), the scalp and periseptum were removed from above the surface of the skull and a head-post was  
144 attached to the skull using dental cement (C&B Metabond, Parkell, Brentwood, NY, United States).  
145 Mice received a subcutaneous injection containing broad-spectrum antibiotics (Cefalexin sodium) and  
146 Buprenorphine daily for at least two days after the surgery

#### 147 **Animal imaging and analyses**

148 MRI scans were acquired with a 9.4T MRI (Bruker BioSpin GmbH, Ettlingen, Germany), using a  
149 quadrature 86 mm transmit-only coil and a 20 mm loop receive-only coil (Bruker). Raw data were  
150 reconstructed using ParaVision 5.1 (Bruker). For both structural and functional scans, data were  
151 registered to a downsampled version of the Allen Mouse Brain Connectivity (AMBC) atlas which

152 includes anatomical annotations (Lein et al., 2007) and optical density maps from anatomical tracing  
153 experiments (Oh et al., 2014).

#### 154 **Structural MRI acquisition and analysis**

155 Mice underwent a single anatomical scan while being anesthetized with isoflurane (0.5–1%) using a  
156 rapid relaxation enhancement (RARE) sequence (repetition time [TR] 6000 ms, echo time [TE] 8.8 ms,  
157 FA 180°, RARE factor 16, 36 coronal slices, matrix  $160 \times 160$ , field of view [FOV]  $16 \times 16 \text{ mm}^2$ ,  $100$   
158  $\times 100 \times 400 \mu\text{m}^3$ ).

159 To estimate the structural changes in the A350V mouse model, a Deformation-based  
160 morphometry (DBM) was used by which the structural MRI scans were registered to a target using a  
161 small-displacement non-linear registration software (Andersson et al., 2007) and the Jacobian  
162 determinants were computed to serve as a measure of deformation. The target was generated by  
163 averaging the anatomical scans of WT mice ( $n = 12$ ). To allow accurate estimation of brain volume,  
164 structural scans were kept in native space and the AMBC atlas was aligned to the target. Whole-brain  
165 volume, excluding the olfactory bulb and cerebellum, was manually defined for each animal and a  
166 whole-brain template was generated by averaging the manual labels for WT mice only. We used AMBC  
167 anatomical annotations to define the regions: cerebral cortex excluding the olfactory bulb (CTX),  
168 hippocampal region (HIP), thalamus (TH), caudoputamen (CP) and piriform cortex (PIR) and thereby  
169 allowing an estimation of anatomical changes between the groups. We further defined six cortical  
170 modules: Prefrontal, Anterolateral, Somatomotor, Visual, Medial and Temporal based on Harris et al.  
171 (2018) with the exception of the rostromedial visual area (VISrl) which is part of the Medial module  
172 and not the Visual module as originally defined.

#### 173 **Resting-state fMRI acquisition and preprocessing**

174 Mice of each genotype ( $n = 13$  per group) underwent multiple awake head-fixed fMRI sessions, as  
175 previously described in Bergmann et al. (2016; see also Shofty et al., 2019). For each session, blood  
176 oxygenation level-dependent (BOLD) contrast scans were acquired using spin echo-echo planar  
177 imaging (SE-EPI) sequence (TR 2500 ms, TE 18.398 ms, FA 90°, 30 coronal slices, matrix  $96 \times 64$ ,  
178 FOV  $14.4 \times 9.6 \text{ mm}^2$ ,  $150 \times 150 \times 450 \mu\text{m}^3$ ). Animals were scanned for 6–8 sessions, four runs per



179 session and 200 repetitions per run. There were no significant differences in the number of included  
180 sessions between A350V ( $6.461 \pm 1.126$  [mean  $\pm$  SD]) and WT mice ( $6.846 \pm 0.688$ ; unpaired  $t$ -test;  
181  $t(24) = 1.05$ ,  $p = 0.304$ ).

182 Raw data were preprocessed as previously described (Bergmann et al., 2016, Shofty et al.,  
183 2019), including removal of the first two volumes for T1-equilibration effects, compensation of slice  
184 dependent time shifts, rigid body correction for head motion, registration to a downsampled version of  
185 the AMBC atlas (Lein et al., 2007, Oh et al., 2014), and intensity normalization. Data scrubbing was  
186 applied as previously described (Power et al., 2014a; Bergmann et al., 2016) with exclusion criteria of  
187 50  $\mu\text{m}$  framewise displacement and derivative RMS variance over voxels (DVARs) of 150% inter-  
188 quartile range (IQR) above the 75th percentile and exclusion of one frame after the detected motion.  
189 Sessions with fewer than 60 included frames were excluded. The data subsequently underwent  
190 demeaning and detrending, nuisance regression of six motion axes, ventricular and white matter signals  
191 and their derivatives, temporal bandpass filtering to retain frequencies between 0.009–0.08 Hz and  
192 spatial smoothing with a full width at half maximum of 600  $\mu\text{m}$ .

### 193 **Functional connectivity analysis**

194 To estimate functional connectivity, a region of interest (ROI, also termed seed) was defined (described  
195 below) and its time course was extracted. Seed-based Fisher's  $Z$  transformed Pearson's  $r$  correlation  
196 maps ( $Z(r)$ ) were averaged across sessions to provide a subject-specific map. For group-level analyses,  
197 the subject-specific maps were submitted to a one-way  $t$ -test for each animal group separately or a two-  
198 way  $t$ -test when comparing the groups to each other (SPM, Wellcome Department of Cognitive  
199 Neurology, London, UK). In addition, seed-to-seed correlations were calculated and averaged across  
200 sessions to estimate functional network alterations between two defined regions and to further examine  
201 whether functional connectivity was correlated with each animal's behavior.

### 202 **Structure–function analysis**

203 To estimate brain-wide alterations in the A350V mouse model in a data-driven approach the overlap  
204 between functional and anatomical connectivity was tested by comparing the optical density maps with  
205 the fcMRI maps, as elaborately described in Bergmann et al. (2016; see also Stafford et al., 2014 and

206 Grandjean et al., 2017). This analysis approach allows to test the hypothesis that functional alterations  
207 in the mutant group will result in altered structure-function relations. An advantage of this specific  
208 analysis approach is that it is not threshold dependent. For group analysis, seed-based statistical  
209 parametric maps were used to estimate anatomical prediction of functional connectivity in association  
210 and sensory regions. Functional connectivity was derived from the A350V and WT acquired here while  
211 anatomical connectivity was derived from C57BL/6J animals who were used to construct the AMBC  
212 atlas (Oh et al., 2014). The location of the seeds (450  $\mu\text{m}$ -diameter spheres) for sensory ( $n = 24$ ) and  
213 association ( $n = 13$ ) regions were defined at the center of the injection site. Correlation maps ( $Z(r)$ ) were  
214 extracted based on seeds (a three-dimensional cross from seven voxels was generated) which  
215 corresponds to 101 out of the 122 C57BL/6J injection sites that were used to define the six cortical  
216 modules in Harris et al. (2018); missing injections include 18 out of 35 injections in VISp, one in MOp  
217 and one in MOs. To characterize structure–function relations we conducted a series of receiver  
218 operating characteristic (ROC) analyses as previously described (Bergmann et al., 2016). Briefly,  
219 anatomical projection volumes were taken from Oh et al. (2014) and compared to functional volume  
220 distributions over multiple statistical thresholds (158 when comparing between the sensory and  
221 association systems and 265 when comparing between A350V and WT). A binary volume threshold of  
222  $0.05 \text{ mm}^3$  was used to define true anatomical connections to examine the sensitivity and specificity of  
223 the prediction of anatomical connections based on functional connections. To estimate the accuracy of  
224 prediction, we calculated the area under each ROC curve, which estimates the relationship between  
225 true-positive and false-positive predictions at different thresholds, indicating how well functional  
226 connectivity discriminates between anatomically connected and unconnected regions.

227 To further examine the functional alterations of regions with altered structure–function  
228 relations, a Sørensen–Dice similarity coefficient was calculated ( $D = 2 \times (A \cap B) / (|A| + |B|)$ ) and used  
229 to quantify the overlap between two tracer injections within the same cortical region. Then, seed-based  
230 analysis was computed to further assess intergroup differences using unpaired two-tailed Student's  $t$ -  
231 test.

## 232 **Statistical analyses**

233 All data were analyzed using MATLAB R2018a (The Mathworks, Natick, MA, USA) except for  
234 behavioral data in which analysis of variance (ANOVA) was analyzed using jamovi Version 1.0.7 (The  
235 jamovi project, 2020). The Lilliefors test was used to determine normality. Behavioral data were found  
236 to be normally distributed. As for the MRI data, since part of the data were not normally distributed,  
237 group comparisons were performed using the non-parametric statistics Mann–Whitney U-test and  
238 Wilcoxon signed-rank test. Correspondence between manual and automated volumetric measurements  
239 and correlation between fcMRI alteration and social behavior were evaluated using Pearson’s  $r$   
240 correlation score. The effect size in the non-parametric statistics was measured as  $r = z / \sqrt{n}$ . Structural  
241 analyses were corrected for multiple comparisons using the false discovery rate (FDR) procedure  
242 (Benjamini and Yekutieli, 2001). The analysis approach was to use the fcMRI data as a discovery  
243 sample. ROIs identified with this approach were used to compute an fcMRI contrast map between  
244 A350V and WT, corrected for multiple comparisons using cluster-level correction. Only a single ROI  
245 and a single region survived this correction and it was subsequently correlated with behavior. Intergroup  
246 differences of the behavioral data were quantified using two-way repeated-measures ANOVA, with  
247 side preference (i.e. time spend in close interaction with *stranger I/object*) defined as a repeated  
248 measure factor and genotype as between subject factor. Detection of outliers in the data was conducted  
249 following the steps suggested in Seo (2006). Symmetry and normality assumptions were assessed for  
250 selecting the appropriate detection method. Hence, Tukey’s and MAD (median absolute deviation)  
251 methods were used to detect and exclude outliers from the behavioral data.

## 252 **Data Sharing**

253 All imaging raw data and the relevant codes used in this study will be made available in BIDS format  
254 on OpenNeuro, <https://openneuro.org/datasets/ds#####>, upon publication.

## 255 **Results**

### 256 **Brain morphology alterations in A350V mouse model**

257 Anatomical alterations have been reported in both humans with ASD and mouse models of ASD (Ecker  
258 et al., 2015; Ellegood et al., 2015). Therefore, we sought to examine whether there are anatomical

259 volumetric differences in the brains of A350V mice relative to WT littermates by using manual  
260 segmentation and automatic non-linear registration of structural MRI. Manual quantification of volumes  
261 ( $n = 13$  per group) showed a statistically significant increase in whole-brain volume in A350V mice as  
262 compared to WT littermates (**Fig. 2A**; Mann–Whitney U-test,  $U = 41$ ,  $p = 0.027$ ,  $r = 0.432$ ), but no  
263 difference in ventricle volume (WT:  $9.937 \pm 0.418$  mm<sup>3</sup> [mean  $\pm$  SEM]; A350V:  $9.685 \pm 0.281$  mm<sup>3</sup>;  
264  $U = 78$ ,  $p = 0.758$ ). After subtraction of the ventricle volume, the intracranial volume of the A350V  
265 mice ( $359.912 \pm 3.405$  mm<sup>3</sup>) was found to be significantly larger relative to WT littermates ( $348.918 \pm$   
266  $2.484$  mm<sup>3</sup>;  $U = 41$ ,  $p = 0.027$ ,  $r = 0.432$ ), suggesting that the increased whole-brain volume is unlikely  
267 to be due to hydrocephalus. Next, we used a deformation-based morphometry method (Andersson et  
268 al., 2007) to automatically evaluate changes in the volumes of the entire brain and substructures.  
269 Consistent with the manual quantification, whole-brain volume as expressed by the Jacobian  
270 deformation was significantly larger in A350V compared to WT (**Fig. 2A**;  $U = 33$ ,  $p = 0.009$ ,  $r = 0.512$ ).  
271 In addition, a significant correlation between the manual whole-brain volume measurements and the  
272 Jacobian deformation measure (**Fig. 2B**;  $n = 13$ ,  $r(24) = 0.845$ ,  $p < 0.001$ ) suggested that the automatic  
273 deformation measure with the current structural imaging acquisition parameters was reliable. The  
274 AMBC atlas was used to define the substructures of the brain and compare volumes of A350V to those  
275 of WT (**Fig. 2C**). We found increased volumes in A350V relative to WT in the cerebral cortex without  
276 the olfactory bulb ( $U = 22$ ,  $p = 0.007$ ; FDR-corrected,  $r = 0.623$ ) and the hippocampal region ( $U = 31$ ,  
277  $p = 0.016$ ; FDR-corrected,  $r = 0.533$ ), but no significant volume differences in the thalamus,  
278 caudoputamen and piriform cortex ( $U$  values  $> 42$ ,  $p$  values  $> 0.052$ ; FDR-corrected).

279 Next, we tested whether the observed structural alterations are attributed to specific regions of  
280 the cortex by dividing it into six modules (Prefrontal, Anterolateral, Somatomotor, Visual, Medial and  
281 Temporal; **Fig. 2D**) following Harris et al. (2018). Volumes were significantly larger in Prefrontal ( $U$   
282  $= 30$ ,  $p = 0.017$ ; FDR-corrected,  $r = 0.543$ ), Somatomotor ( $U = 30$ ,  $p < 0.017$ ; FDR-corrected,  $r =$   
283  $0.543$ ), Anterolateral ( $U = 39$ ,  $p = 0.031$ ; FDR-corrected,  $r = 0.452$ ) and Medial ( $U = 35$ ,  $p = 0.024$ ;  
284 FDR-corrected,  $r = 0.492$ ) modules in the A350V compared to WT ( $n = 13$  per group), with no  
285 significant differences observed in the Visual ( $U = 67$ ,  $p = 0.383$ ) and Temporal ( $U = 69$ ,  $p = 0.441$ )  
286 modules.

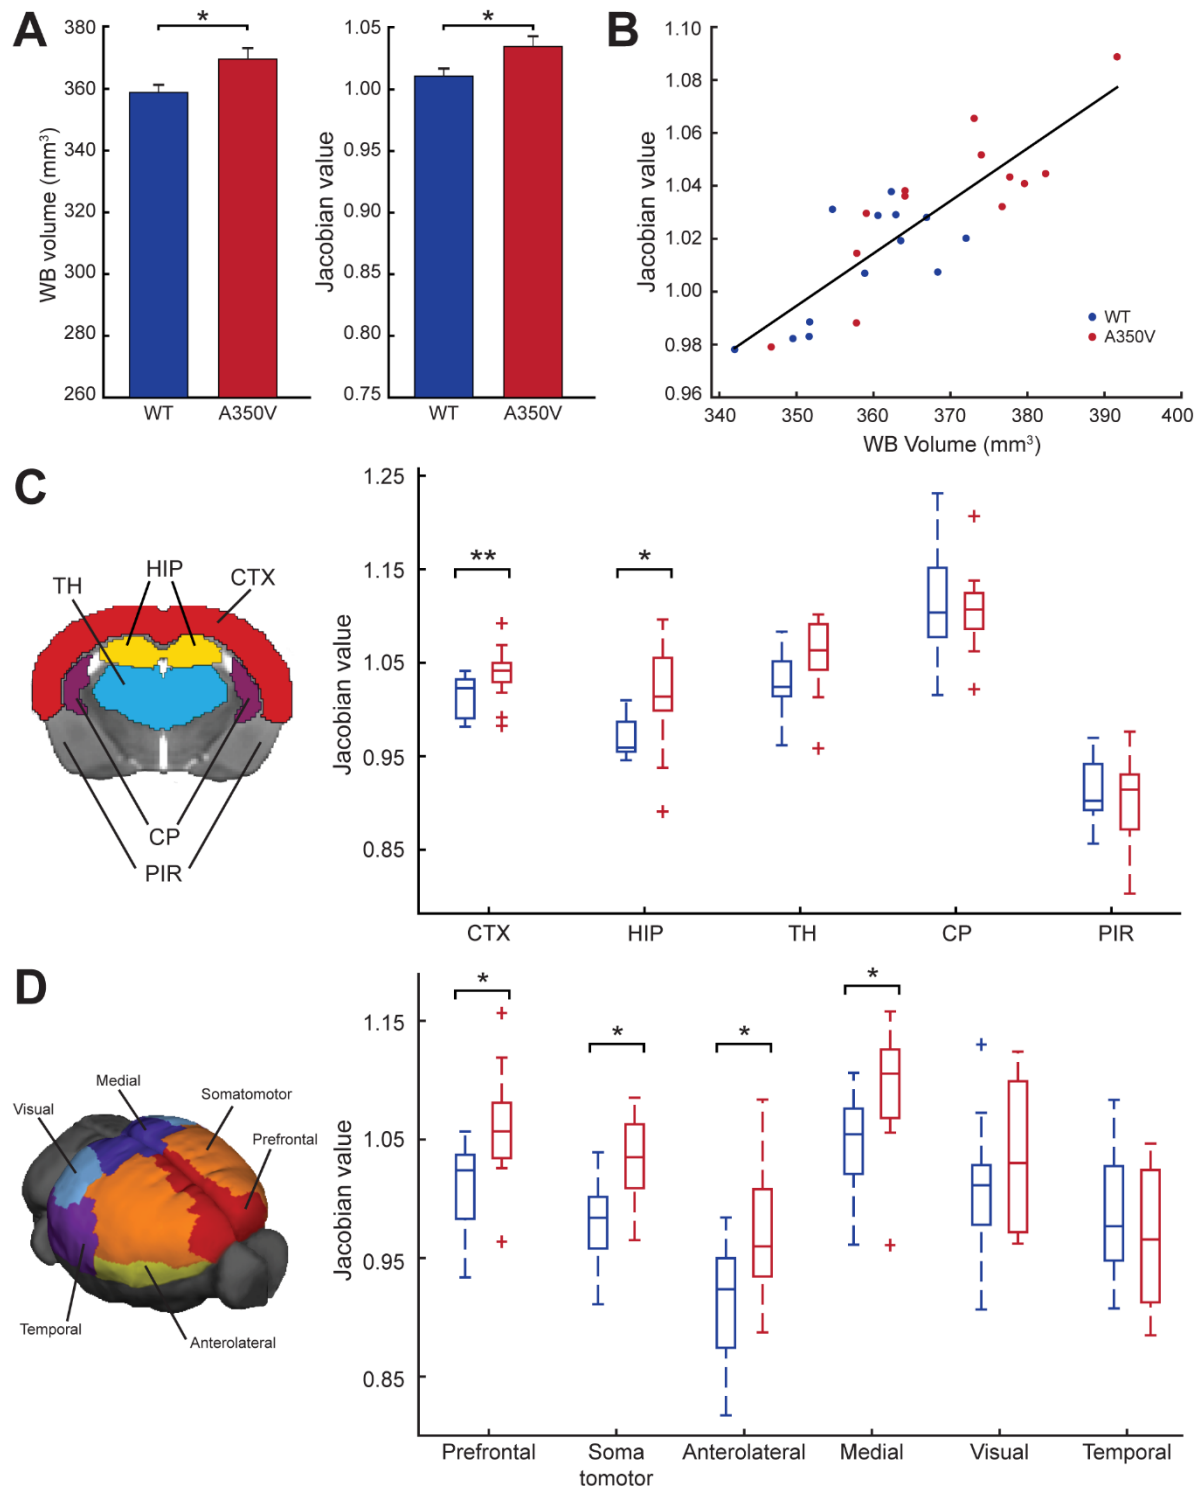

287

288

289

290

291

292

293

294

295

296

**Figure 2.** Structural alterations in A350V IQSEC2 mouse model. **A**, Whole-brain volume increase in A350V mice shown by manual volume quantification (*left*) and automatic registration evaluation (*right*). **B**, Correlation between Jacobian determinant and whole-brain volume showing an agreement between the two evaluation methods. **C**, Jacobian determinant of the different brain structures depicted on the left indicates increased volume of CTX and HIP in A350V mice. **D**, Jacobian determinant of the six cortical modules depicted on the left indicates increased volume of the Prefrontal, Somatomotor, Anterolateral and Medial modules in A350V mice. Data indicate mean  $\pm$  SEM. Mann–Whitney U Test; \*  $p < 0.05$ , \*\*  $p < 0.01$ , FDR-corrected. CTX, cerebral cortex; HIP, hippocampal region; TH, thalamus; CP, caudoputamen; PIR, piriform area.

297 **Structure–function analysis reveals cortical alterations in A350V mice**

298 To assess the functional disruption in the A350V mouse brain, we used functional connectivity MRI. It  
299 has been previously shown that fcMRI tracks anatomical connectivity, and that this coupling can be  
300 used to reveal functional connectivity based on brain architecture (Stafford et al., 2014; Bergmann et  
301 al., 2016; Grandjean et al., 2017; Melozzi et al., 2019). We used ROC analysis to evaluate the structure–  
302 function relations of cortical systems, by comparing the optical density tracer injection maps of the  
303 AMBC to the functional connectivity maps acquired using fcMRI (**Fig. 3A**). First, we examined the  
304 agreement between anatomical and functional connectivity at the group level, for systems that are  
305 hierarchically organized (sensory networks) relative to systems that are not predominantly hierarchical  
306 (association networks), as previously shown by Bergmann et al. (2016). This comparison is informative  
307 as it allows an assessment as to whether structure–function relations at the whole-brain level can be  
308 better explained by first synapse projections of sensory networks, due to their hierarchical organization,  
309 relative to association networks. At the group level, seed-based statistical parametric maps were  
310 computed for A350V and WT separately and then submitted to ROC analysis. We found that the area  
311 under the ROC curve (auROC), a measure of predictive strength, was higher in sensory relative to  
312 association networks for both groups (**Fig. 3B**; WT:  $U = 84$ ,  $p = 0.022$ ,  $r = 0.374$ ; A350V:  $U = 71$ ,  $p =$   
313  $0.007$ ,  $r = 0.442$ ). There were no significant differences when comparing the auROC of each class of  
314 networks separately between A350V and WT ( $U_{\text{Sensory}} = 264$ ,  $p = 0.628$ ;  $U_{\text{Association}} = 75$ ,  $p = 0.644$ ).  
315 Finally, we sought to test whether the observed anatomical macrocephaly we found in A350V mice  
316 would be reflected in the structure–function relations of the six cortical modules. When comparing the  
317 auROC values of each module between the groups we found no significant differences (**Fig. 3C**;  
318  $U_{\text{Prefrontal}} = 262$ ,  $p = 0.965$ ;  $U_{\text{Somatomotor}} = 413$ ,  $p = 0.345$ ;  $U_{\text{Anterolateral}} = 16$ ,  $p = 0.8182$ ;  $U_{\text{Medial}} = 37$ ,  $p =$   
319  $0.344$ ;  $U_{\text{Visual}} = 230$ ,  $p = 0.787$ ; and  $U_{\text{Temporal}} = 35$ ,  $p = 0.666$ ).

320 Quantification of structure–function relations allows an assessment as to whether disruption in  
321 functional connectivity at the single animal level localizes to subnetworks within the modules as defined  
322 by specific tracer injections and their first synapse projections. We adapted the above structure–function  
323 group-level approach to the individual level by submitting correlation maps ( $Z(r)$ ) of each individual  
324 animal ( $n = 13$  per group), rather than the group average seed-based statistical parametric map (as was

325 done above), to the ROC analysis. We first replicated the sensory vs. association networks analysis  
326 described above at the individual level by averaging all system-related seeds per animal. Similar to the  
327 group-level auROC analysis, we found that the sensory system was higher than the association system  
328 in both groups (WT: Sensory = 0.743 [median], Association = 0.676; Wilcoxon Signed-rank test,  $p <$   
329 0.001,  $Z = 3.18$ ,  $r = 0.623$ ; A350V: Sensory = 0.74, Association = 0.673; Wilcoxon Signed-rank test,  
330  $p < 0.001$ ,  $Z = 3.18$ ,  $r = 0.623$ ).

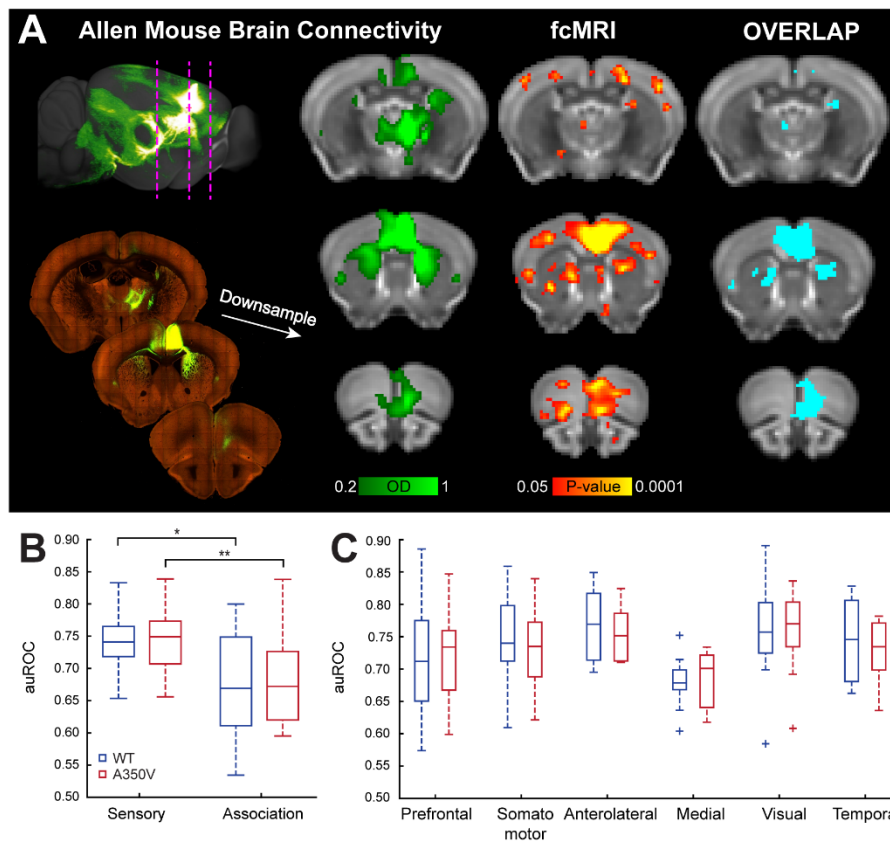

331 **Figure 3.** Anatomical connections predict functional connectivity at a group-level. **A**, Analysis scheme  
332 for comparing structure–function relations using MRI shown for Allen mouse brain connectivity (AMBC)  
333 atlas experiment #112514202, ACAv injection. A maximum intensity projection sagittal view of signal  
334 density (*top, left*) and three representative coronal slices showing multiple anatomical connections  
335 (*bottom, left*) in AMBC space. Approximate locations of the presented coronal sections are indicated by  
336 magenta dashed lines. The arrow indicates the corresponding downsampled coronal slices (optical  
337 density, [OD] in green-light green, normalized OD > 0.2). An fcMRI statistical parametric map (in *red-*  
338 *yellow*) of positive correlations of ACAv on a downsampled version of the AMBC Atlas that matches the  
339 original fMRI resolution;  $p < 0.05$ , corrected for multiple comparisons using family-wise error rate  
340 correction for the whole mouse brain. Overlap of functional and anatomical connectivity (*pale blue*)  
341 demonstrates a close agreement across the two modalities. **B**, The area under receiver operating  
342 characteristic (auROC) curve values demonstrate higher structure–function relations in sensory relative  
343 to association systems for both WT (*blue*) and A350V (*red*) mice. **C**, The six cortical modules auROC  
344 values demonstrate equivalent structure–function relations between the two groups for all modules.  
345

346 Next, to identify specific disrupted regions we quantified structure–function relations for  
347 individual injections reported by Harris et al. (2018). We generated seeds that correspond to the  
348 locations of 101 C57BL/6J tracer injections, computed the seed-based correlation maps of individual  
349 animals and compared the auROC values of each injection across the two groups. We discovered  
350 significant differences in six injections located in the anterior cingulate, auditory and visual cortices  
351 (**Fig. 4**). The auROC values for the ACAd and ACAv regions were significantly higher in A350V  
352 relative to WT ( $U_{ACAd} = 42, p = 0.031, r = 0.422$ ;  $U_{ACA\text{v}} = 34, p = 0.01, r = 0.503$ ), suggesting that the  
353 anatomical connectivity served as a better predictor than the functional connectivity in A350V.  
354 Conversely, AUDpo, AUDd, VISli and VISp regions showed reduced auROC values in A350V relative  
355 to WT ( $U_{AUD\text{po}} = 42, p = 0.031, r = 0.422$ ;  $U_{AUD\text{d}} = 24, p = 0.002, r = 0.603$ ;  $U_{VIS\text{li}} = 42, p = 0.031, r =$   
356  $0.422$ ;  $U_{VIS\text{p}} = 42, p = 0.031, r = 0.422$ ).

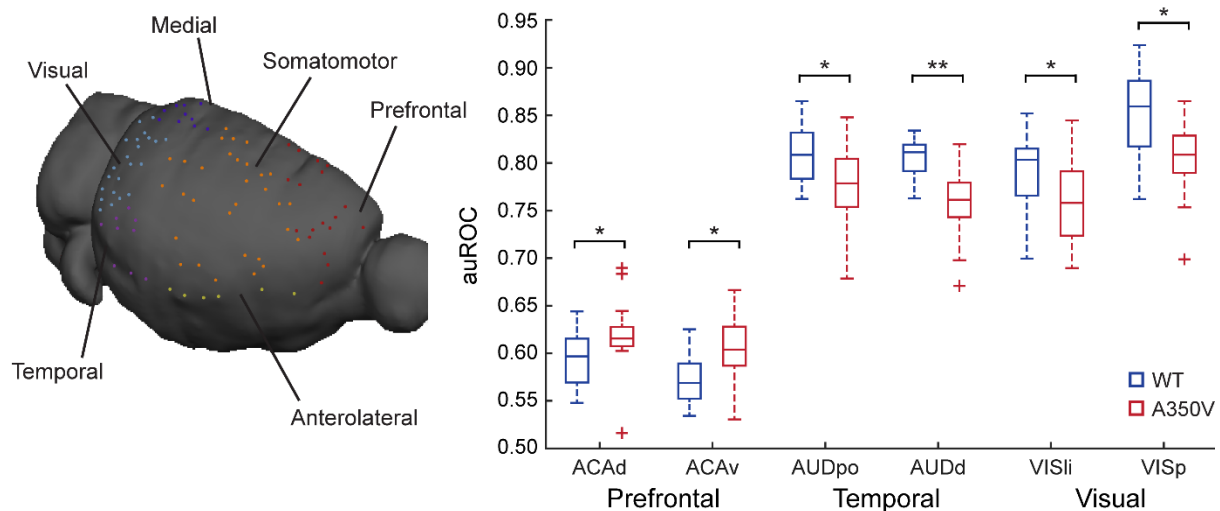

357 **Figure 4.** Structure–function relations at the individual level reveal altered functional connectivity in  
358 A350V relative to WT. The seeds corresponding to AMBC tracer injections are illustrated on a mouse  
359 cortical surface (*left*). Seeds are color coded for the six cortical modules. The area under receiver  
360 operating characteristic (auROC) curve values (*right*) indicate increased structure–function relations in  
361 A350V mice (*red*) for ACAd and ACAv and greater overlap in WT mice (*blue*) for AUDpo, AUDd, VISli  
362 and VISp. Mann–Whitney U Test;  $n = 13$  per group, \*  $p < 0.05$ , \*\*  $p < 0.01$  (uncorrected for multiple  
363 comparisons). ACAd, anterior cingulate area, dorsal part; ACAv, anterior cingulate area, ventral part;  
364 AUDpo, posterior auditory area; AUDd, dorsal auditory area; VISli, laterointermediate visual area; VISp,  
365 primary visual area.  
366

367 Following the altered structure–function relations described above, we sought to further  
368 investigate whether these regions demonstrated functional changes at the network level. Since the pairs  
369 of the regions (ACAd/ACA\text{v}, AUDpo/AUDd, and VISli/VISp) are potentially overlapping to the extent  
370 that they are effectively identical, we evaluated the overlap of the tracer injections for each pair of



371 proximal regions using the Sørensen–Dice similarity coefficient. We found a substantial overlap for  
372 ACAd/ACAv and AUDpo/AUDd (Dice index of 0.861 and 0.757, respectively), and therefore in further  
373 analyses they were considered as single regions, designated ACAd/v and AUDpo/d. The VISli and  
374 VISp similarity coefficient was 0.545 and they were therefore considered as two separate networks.

### 375 **Corticostriatal alterations in functional connectivity are associated with social impairments**

376 To further dissect the alterations found in the structure-function analysis we computed a two-way *t*-test  
377 statistical parametric map between the groups for each of the above seed-based correlation maps. Of  
378 the above regions, only the comparison between A350V and WT of the ACAd/v seed-based maps  
379 showed a significant increase in functional connectivity in A350V mice which was exclusive to the  
380 dorsomedial caudoputamen (CP) (**Fig. 5A**; *t*-test,  $p = 0.01$ , FWE cluster-level corrected, with cluster-  
381 defining threshold of  $t(24) > 2.49$ ,  $p < 0.01$ ). Next, we performed a seed-to-seed correlation analysis  
382 between the ACAd/v and the ROI in the CP that was found in the prior analysis obtaining correlation  
383 values at the individual animal level (**Fig. 5B**). As expected, A350V mice displayed increased ACAd/v–  
384 CP connectivity relative to WT ( $U = 26$ ,  $p = 0.002$ ,  $r = 0.583$ ).

385 In the human index case with the A350V IQSEC2 mutation abnormalities in social behaviors  
386 were found (Zipper et al., 2017). Thus, social behavior was assessed using a three-chamber sociability  
387 test (**Fig. 5C**). When we examined social preference as a measure of time spent in close interaction, a  
388 repeated-measures ANOVA revealed a significant main effect of Side ( $F(1,29) = 45.39$ ,  $p < 0.001$ ,  $\eta_p^2$   
389  $= 0.61$ ) as well as an interaction between Side and Genotype ( $F(1,29) = 4.17$ ,  $p = 0.05$ ,  $\eta_p^2 = 0.126$ ). A  
390 further post-hoc analysis revealed a significant difference in time spent in close interaction with an  
391 unfamiliar mouse between A350V and WT (*t*-test,  $t = 2.444$ ,  $p = 0.035$ , Holm–Bonferroni correction).  
392 Collectively, these results indicate that both A350V and WT mice prefer interacting with an unfamiliar  
393 mouse over an object yet this preference was reduced in A350V relative to WT.

394 Finally, to test whether the abnormal social behavior found in A350V model can be explained  
395 by the neurophysiological alterations that were obtained from the same animal cohort, we correlated  
396 the social preference measurement both with the structural deformation and the seed-to-seed functional  
397 connectivity. The observed volumetric differences showed no significant correlation with the behavioral

398 impairments that were found (data not shown). When examining the relations between the altered  
 399 ACAd/v-CP functional connectivity with the observed social behavior, we found a significant  
 400 correlation of functional connectivity magnitude and social preference for A350V only (**Fig. 5D**;  
 401 A350V:  $r(10) = 0.627$ ,  $p = 0.029$ ; WT:  $r(9) = 0.267$ ,  $p = 0.426$ ). Namely, equivalent functional  
 402 connectivity between A350V and WT resulted in reduced social interaction in A350V, while increased  
 403 corticostriatal connectivity in A350V is associated with normal levels of social interaction as found in  
 404 WT.

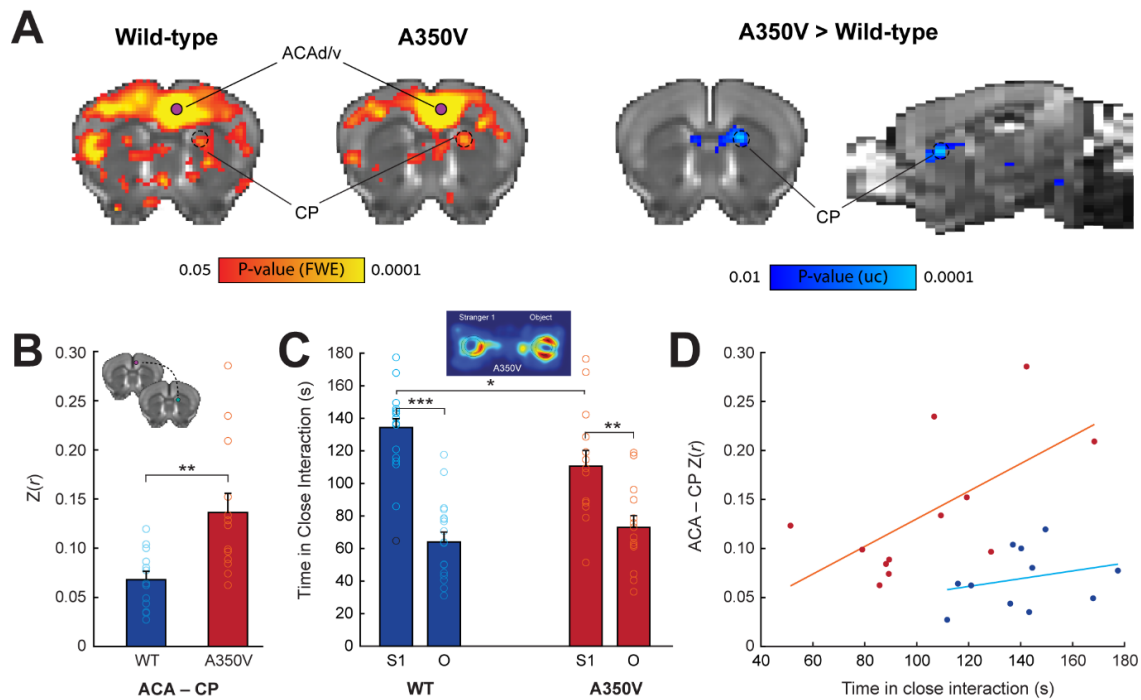

405

406 **Figure 5.** Corticostriatal functional connectivity correlates with disrupted sociability in A350V mice. **A**,  
 407 Seed-based comparison of the ACAv/d showing fcMRI statistical parametric maps (*red-yellow*) of  
 408 positive correlations for WT (*left*) and A350V mice (*right*) ( $p < 0.05$ , corrected for multiple comparisons  
 409 using whole-brain family-wise error (FWE) rate correction) and an fcMRI statistical parametric map  
 410 (*blue-light blue*) of increased connectivity in A350V relative to WT showing significant increase in the  
 411 dorsomedial CP (two-way unpaired  $t$ -test,  $p = 0.01$ , FWE cluster-corrected, with cluster-defining  
 412 threshold of  $t(24) > 2.49$ ,  $p < 0.01$ , voxel extent  $\geq 5$ ). All maps are displayed on a downsampled version  
 413 of the AMBC Atlas that matches the original fMRI resolution. Purple circles indicate the ACAd/v seed  
 414 location. Black dashed circle indicates CP cluster that was found significant. **B**, Seed-to-seed correlation  
 415 between ACAd/v and CP showing increased connectivity in A350V mice. Colored circles indicate  
 416 individual subject  $z$ -score. Coronal slices showing seed location for ACAd/v (*purple*) and CP (*green*)  
 417 (*top left*). **C**, Duration of time spent in close interaction with Stranger 1 (S1) and an object (O) in the  
 418 three-chamber social preference test demonstrating that both A350V and WT prefer interacting with S1,  
 419 although this preference is less pronounced in A350V. Colored circles indicate individual subject  
 420 variability in sociability measurement with black circle indicating outlier in the data. A representative  
 421 heat map analysis of A350V mouse is depicted (*top center*). **D**, Connectivity between ACAd/v and CP  
 422 in relation to sociability showing significant correlation for A350V mice only. Data indicate mean  $\pm$  SEM.  
 423 Mann-Whitney U Test (**A**); \*\*  $p < 0.01$ . Two-way rmANOVA, with Holm-Bonferroni post hoc  $t$ -test (**C**);  
 424 \*  $p < 0.05$ , \*\*  $p < 0.01$ , \*\*\*  $p < 0.001$ . ACA, anterior cingulate area; CP, caudoputamen.

## 425 **Discussion**

426 We explored the neurophysiological changes in a novel transgenic A350V mouse model which is based  
427 on a human *de novo* mutation in the IQSEC2 gene associated with ASD. We show that A350V mice  
428 exhibit overall increased brain volume, restricted to the cortex including the hippocampus, along with  
429 alterations in structure–function relations of the frontal, auditory and visual systems. We also show  
430 changes in corticostriatal functional connectivity which are associated with individual variability in  
431 social behavior, demonstrating that the equivalent levels of corticostriatal functional connectivity  
432 between A350V and WT correspond to reduced social interaction in the three–chamber social  
433 preference test in A350V. Collectively, these findings suggest that the A350V missense mutation in the  
434 IQSEC2 gene induces ASD features that are derived from corticostriatal dysfunction and may serve as  
435 a translational model from human to mouse.

436 IQSEC2 is one of many ASD-linked genes that encode post synaptic density proteins of  
437 glutamatergic synapses, such as CNTNAP (contactin-associated protein), neuroligin, NF1  
438 (neurofibromin 1), SHANK family and more (Peça and Feng, 2012). While the signal transduction  
439 pathway of IQSEC2 is not fully understood, it has been previously suggested that IQSEC2 functions as  
440 a guanine nucleotide exchange factor (GEF) for ADP-ribosylation factors (Arfs), and that the Arf-GEF  
441 activity further regulates AMPA receptor trafficking (Murphy et al., 2006; Brown et al., 2016). In the  
442 case of the A350V mutation, it has been proposed that there is a constitutive activation of the GEF  
443 activity of IQSEC2 that results in increased endocytosis of AMPA receptors via constant activation of  
444 Arf6 along with other processes that are less understood (Rogers et al., 2019).

445 In ASD, human studies have consistently demonstrated a modest but significant increase in  
446 overall brain volume in toddlers (Piven et al., 2017). In a recent study characterizing structural  
447 alterations in 26 ASD mouse models using MRI, these models were classified to three subtypes  
448 according to alterations in volume and connectivity (Ellegood et al., 2015). The authors found that all  
449 of the mouse models that were associated with increased brain volume were classified in the same  
450 subtype (NRXN1 $\alpha^{-/-}$ , NRXN1 $\alpha^{-/+}$  and FMR1 $^{-/y}$  FVB). However, other models within this subtype either  
451 showed no change in brain volume (En2 $^{-/-}$  and FMR1 $^{-/y}$  B $\wedge$ ) or decrease in brain volume (SHANK3 $^{-/-}$

452 and SHANK3<sup>-/+</sup>). Collectively, this evidence suggests that brain volume is not a critical distinguishing  
453 feature. Related to the reported A350V mutation, in a recent study using female mice (Jackson et al.,  
454 2019), heterozygous loss of function of the IQSEC2 gene showed thinning of the corpus callosum along  
455 with increased volume of the hippocampus and specifically the dentate gyrus within it (cortical volume  
456 was not reported). Here, male A350V mice presented an increase in whole-brain volume that was found  
457 to derive from cortical and hippocampal enlargement. We found a volume increase in four out of the  
458 six cortical modules, suggesting a non-specific cortical enlargement. Further, unlike the functional  
459 connectivity results, increased volume was not correlated with altered social behavior identified in this  
460 model and are possibly relevant to other behavioral features presented in this model (Rogers et al.,  
461 2019). Taken together with Ellegood et al. (2015), it is suggested that the observed macrocephaly in  
462 A350V mice is unlikely to be involved in the pathophysiology of the brain connectivity we report here.

463 Numerous studies implicated corticostriatal alterations in ASD pathophysiology in humans and  
464 animals. A study comparing ASD and typically developing children showed increased functional  
465 connectivity between striatal subregions and both association and limbic cortices (Di Martino et al.,  
466 2011). In a study using connectivity-based parcellation, a difference in the organization of corticostriatal  
467 circuitry in ASD was reported, demonstrating that the separation of the putamen to distinct anterior and  
468 posterior clusters is absent in ASD participants, and is potentially driven from a connectivity fingerprint  
469 of several cortical regions (Balsters et al., 2018). Previous studies in the SHANK3 mouse model have  
470 demonstrated dysfunction of corticostriatal activity (Peça et al., 2011; Peixoto et al., 2016), with the  
471 striatum playing a causal role in repetitive grooming behavior (Wang et al., 2017). A recent fcMRI  
472 study in the same mouse model showed an overall prefrontal hypoconnectivity along with disrupted  
473 functional connectivity between the ACA and the caudoputamen (Pagani et al., 2019). Consistent with  
474 these reports, we found altered functional connectivity between the ACA and the dorsomedial striatum.  
475 Collectively, these findings emphasize the contribution of association and limbic corticostriatal hyper-  
476 or hypo-connectivity to ASD-related pathology. Moreover, anatomical homology and recapitulation of  
477 findings when using fMRI in ASD genetic mouse models suggest that the pathophysiological findings  
478 in genetic animal models are likely to translate to humans.

479           Studying the contribution of specific brain structures to behavior is particularly important when  
480 it comes to understanding neuropathology of diseases, as it can help dissect the relevance of specific  
481 brain structures to behavioral features and subsequently identify disease pathophysiology. In a task-  
482 based fMRI study, hyperconnectivity between the anterior cingulate cortex and the caudate has been  
483 shown to be associated with deactivation to social rewards in ASD participants (Delmonte et al., 2012).  
484 Several studies of ASD mouse models linked brain function and social behavior impairments.  
485 Homozygous loss of the *CNTNAP2* (contactin-associated protein-like 2) gene results in frontoposterior  
486 hypoconnectivity, a finding that has been reported in several ASD models, which was further associated  
487 with reduced social investigation in a male–female social interaction test (Liska et al., 2018). In addition  
488 to ACA–CP disrupted connectivity, the SHANK3 fMRI study mentioned above showed that prefrontal  
489 hypoconnectivity is correlated with socio-communicative deficits (Pagani et al., 2019). These findings  
490 are consistent with a study showing that specific deletion of SHANK3 in the ACA is sufficient to induce  
491 social impairments, suggesting that the ACA plays a role in regulating social behavior (Guo et al.,  
492 2019). In our study, A350V mice presented high variability in the sociability measurement using the  
493 three-chamber sociability task. We found this variability to be correlated with the connectivity levels  
494 between the ACA and the dorsomedial striatum. While the A350V mouse model showed an overall  
495 increase in corticostriatal connectivity, we observed that the A350V mice with functional connectivity  
496 levels equivalent to WT littermates presented low sociability levels as compared to these WT  
497 littermates, while the A350V mice with high connectivity levels presented normal sociability levels.  
498 This result suggests that increased levels of connectivity may reflect a compensatory neural response  
499 mitigating social impairments in the A350V model. The concept of neural response of compensatory  
500 nature on cognitive function has long been recognized (Basso et al., 1989; Ullman and Pullman, 2015)  
501 and has been previously suggested to underly variability in disease severity in ASD (e.g., Livingston  
502 and Happé, 2017). To fully understand the pathophysiology of the A350V model future studies will  
503 need to causally address the role of ACA in social impairments.

504           Finally, we would like to propose the A350V IQSEC2 mouse as a putative ASD model. Overall,  
505 our results are consistent with brain alterations found in several ASD models. The diversity of genetic  
506 mutations which lead to similar brain-wide and associated behavioral changes in ASD suggests that the

507 ability to offer precise therapies for ASD depends on understanding how diverse neural pathologies are  
508 linked to ASD. Specifically, future research which will more fully characterize the cellular  
509 pathophysiological changes that drive the brain-wide level effects observed in the A350V model and  
510 the relation of these changes to the brain-wide changes observed across the diverse ASD models will  
511 facilitate progress in understanding the causes of ASD in A350V IQSEC2 and proposing paths to therapy.

512 **References**

- 513 Andersson J, Jenkinson M, Smith S (2007) Non-linear registration, aka spatial normalisation. FMRIB  
514 Technial Report TR07JA2. Oxford Cent Funct Magn Reson Imaging Brain, Dep Clin Neurol  
515 Oxford Univ Oxford, UK:22 Available at:  
516 <http://www.fmrib.ox.ac.uk/analysis/techrep/tr07ja2/tr07ja2.pdf>.
- 517 Balsters JH, Mantini D, Wenderoth N (2018) Connectivity-based parcellation reveals distinct cortico-  
518 striatal connectivity fingerprints in Autism Spectrum Disorder. *Neuroimage* 170:412–423  
519 Available at: <https://doi.org/10.1016/j.neuroimage.2017.02.019>.
- 520 Basso A, Gardelli M, Grassi MP, Mariotti M (1989) The Role of the Right Hemisphere in Recovery  
521 from Aphasia. Two Case Studies. *Cortex* 25:555–566.
- 522 Benjamini Y, Yekutieli D (2001) The control of the false discovery rate in multiple testing under  
523 dependency. *Ann Stat* 29:1165–1188.
- 524 Bergmann E, Zur G, Bershadsky G, Kahn I (2016) The organization of mouse and human cortico-  
525 hippocampal networks estimated by intrinsic functional connectivity. *Cereb Cortex* 26:4497–  
526 4512.
- 527 Bertero A, Liska A, Pagani M, Parolisi R, Masferrer ME, Gritti M, Pedrazzoli M, Galbusera A, Sarica  
528 A, Cerasa A, Buffelli M, Tonini R, Buffo A, Gross C, Pasqualetti M, Gozzi A (2018) Autism-  
529 associated 16p11.2 microdeletion impairs prefrontal functional connectivity in mouse and  
530 human. *Brain* 141:2055–2065.
- 531 Brown JC, Petersen A, Zhong L, Himelright ML, Murphy JA, Walikonis RS, Gerges NZ (2016)  
532 Bidirectional regulation of synaptic transmission by BRAG1/IQSEC2 and its requirement in  
533 long-term depression. *Nat Commun* 7:1–15 Available at:  
534 <http://dx.doi.org/10.1038/ncomms11080>.
- 535 Buckner RL, Sepulcre J, Talukdar T, Krienen FM, Liu H, Hedden T, Andrews-Hanna JR, Sperling  
536 RA, Johnson KA (2009) Cortical hubs revealed by intrinsic functional connectivity: Mapping,  
537 assessment of stability, and relation to Alzheimer’s disease. *J Neurosci* 29:1860–1873.
- 538 Delmonte S, Balsters JH, McGrath J, Fitzgerald J, Brennan S, Fagan AJ, Gallagher L (2012) Social  
539 and monetary reward processing in autism spectrum disorders. *Mol Autism* 3:1–13.
- 540 Di Martino A, Kelly C, Grzadzinski R, Zuo XN, Mennes M, Mairena MA, Lord C, Castellanos FX,  
541 Milham MP (2011) Aberrant striatal functional connectivity in children with autism. *Biol*  
542 *Psychiatry* 69:847–856 Available at: <http://dx.doi.org/10.1016/j.biopsych.2010.10.029>.
- 543 Ecker C, Bookheimer SY, Murphy DGM (2015) Neuroimaging in autism spectrum disorder: Brain  
544 structure and function across the lifespan. *Lancet Neurol* 14:1121–1134 Available at:  
545 [http://dx.doi.org/10.1016/S1474-4422\(15\)00050-2](http://dx.doi.org/10.1016/S1474-4422(15)00050-2).
- 546 Ellegood J et al. (2015) Clustering autism: Using neuroanatomical differences in 26 mouse models to  
547 gain insight into the heterogeneity. *Mol Psychiatry* 20:118–125.
- 548 Elsabbagh M, Divan G, Koh YJ, Kim YS, Kauchali S, Marcín C, Montiel-Nava C, Patel V, Paula CS,  
549 Wang C, Yasamy MT, Fombonne E (2012) Global Prevalence of Autism and Other Pervasive  
550 Developmental Disorders. *Autism Res* 5:160–179.
- 551 Fox MD, Raichle ME (2007) Spontaneous fluctuations in brain activity observed with functional  
552 magnetic resonance imaging. *Nat Rev Neurosci* 8:700–711.
- 553 Geschwind DH, State MW (2015) Gene hunting in autism spectrum disorder: On the path to precision  
554 medicine. *Lancet Neurol* 14:1109–1120.
- 555 Gilman SR, Iossifov I, Levy D, Ronemus M, Wigler M, Vitkup D (2011) Rare De Novo Variants

- 556 Associated with Autism Implicate a Large Functional Network of Genes Involved in Formation  
557 and Function of Synapses. *Neuron* 70:898–907 Available at:  
558 <http://dx.doi.org/10.1016/j.neuron.2011.05.021>.
- 559 Grandjean J, Zerbi V, Balsters JH, Wenderoth N, Rudin M (2017) Structural Basis of Large-Scale  
560 Functional Connectivity in the Mouse. *J Neurosci* 37:8092–8101.
- 561 Guo B, Chen J, Chen Q, Ren K, Feng D, Mao H, Yao H, Yang J, Liu H, Liu Y, Jia F, Qi C, Lynn-  
562 Jones T, Hu H, Fu Z, Feng G, Wang W, Wu S (2019) Anterior cingulate cortex dysfunction  
563 underlies social deficits in Shank3 mutant mice. *Nat Neurosci* 22:1223–1234 Available at:  
564 <http://dx.doi.org/10.1038/s41593-019-0445-9>.
- 565 Harris JA et al. (2018a) The organization of intracortical connections by layer and cell class in the  
566 mouse brain. *bioRxiv*:292961 Available at:  
567 <https://www.biorxiv.org/content/early/2018/04/18/292961>.
- 568 Harris JA et al. (2018b) The organization of intracortical connections by layer and cell class in the  
569 mouse brain. *bioRxiv*:292961.
- 570 Jackson MR, Loring KE, Homan CC, Thai MHN, Määttänen L, Arvio M, Jarvela I, Shaw M, Gardner  
571 A, Gez J, Shoubridge C (2019) Heterozygous loss of function of IQSEC2/Iqsec2 leads to  
572 increased activated Arf6 and severe neurocognitive seizure phenotype in females. *Life Sci*  
573 *Alliance* 2:1–18.
- 574 Kalscheuer VM, James VM, Himeiright ML, Long P, Oegema R, Jensen C, Bienek M, Hu H, Haas  
575 SA, Topi M, Hooeboom AJM, Harvey K, Walikonis R, Harvey RJ (2016) Novel missense  
576 mutation A789V in IQSEC2 underlies X-linked intellectual disability in the MRX78 family.  
577 *Front Mol Neurosci* 8:1–10.
- 578 Lein ES et al. (2007) Genome-wide atlas of gene expression in the adult mouse brain. *Nature*  
579 445:168–176.
- 580 Liska A, Bertero A, Gomolka R, Sabbioni M, Galbusera A, Barsotti N, Panzeri S, Scattoni ML,  
581 Pasqualetti M, Gozzi A (2018) Homozygous loss of autism-risk gene *cntnap2* results in reduced  
582 local and long-range prefrontal functional connectivity. *Cereb Cortex* 28:1141–1153.
- 583 Liska A, Gozzi A (2016) Can mouse imaging studies bring order to autism connectivity chaos? *Front*  
584 *Neurosci* 10:1–8.
- 585 Livingston LA, Happé F (2017) Conceptualising compensation in neurodevelopmental disorders:  
586 Reflections from autism spectrum disorder. *Neurosci Biobehav Rev* 80:729–742.
- 587 Mannion A, Leader G (2013) Comorbidity in autism spectrum disorder: A literature review. *Res*  
588 *Autism Spectr Disord*.
- 589 Matson JL, Nebel-Schwalm MS (2007) Comorbid psychopathology with autism spectrum disorder in  
590 children: An overview. *Res Dev Disabil*.
- 591 Melozzi F, Bergmann E, Harris JA, Kahn I, Jirsa V, Bernard C (2019) Individual structural features  
592 constrain the mouse functional connectome. *Proc Natl Acad Sci U S A* 116:26961–26969.
- 593 Mignot C et al. (2019) IQSEC2-related encephalopathy in males and females: a comparative study  
594 including 37 novel patients. *Genet Med* 21:837–849.
- 595 Moy SS, Nadler JJ, Perez A, Barbaro RP, Johns JM, Magnuson TR, J. Piven, Crawley JN (2004)  
596 Sociability and preference for social novelty in five inbred strains: an approach to assess autistic-  
597 like behavior in mice. *Intersect Cult Sex Genres*:287–302.
- 598 Murphy JA, Jensen ON, Walikonis RS (2006) BRAG1, a Sec7 domain-containing protein, is a  
599 component of the postsynaptic density of excitatory synapses. *Brain Res* 1120:35–45.



- 600 Oh SW et al. (2014) A mesoscale connectome of the mouse brain. *Nature* 508:207–214 Available at:  
601 <http://dx.doi.org/10.1038/nature13186>.
- 602 Pagani M, Bertero A, Liska A, Galbusera A, Sabbioni M, Barsotti N, Colenbier N, Marinazzo D,  
603 Scattoni ML, Pasqualetti M, Gozzi A (2019) Deletion of autism risk gene shank3 disrupts  
604 prefrontal connectivity. *J Neurosci* 39:5299–5310.
- 605 Parikshak NN, Luo R, Zhang A, Won H, Lowe JK, Chandran V, Horvath S, Geschwind DH (2013)  
606 Integrative functional genomic analyses implicate specific molecular pathways and circuits in  
607 autism. *Cell* 155:1008 Available at: <http://dx.doi.org/10.1016/j.cell.2013.10.031>.
- 608 Peça J, Feliciano C, Ting JT, Wang W, Wells MF, Venkatraman TN, Lascola CD, Fu Z, Feng G  
609 (2011) Shank3 mutant mice display autistic-like behaviours and striatal dysfunction. *Nature*  
610 472:437–442.
- 611 Peça J, Feng G (2012) Cellular and synaptic network defects in autism. *Curr Opin Neurobiol*.
- 612 Peixoto RT, Wang W, Croney DM, Kozorovitskiy Y, Sabatini BL (2016) Early hyperactivity and  
613 precocious maturation of corticostriatal circuits in Shank3B  $\Delta$  mice. *Nat Neurosci* 19:716–  
614 724.
- 615 Petersen A, Brown JC, Gerges NZ (2018) BRAG1/IQSEC2 as a regulator of small GTPase-dependent  
616 trafficking. *Small GTPases* 1248:1–7 Available at:  
617 <https://doi.org/10.1080/21541248.2017.1361898>.
- 618 Piven J, Elison JT, Zylka MJ (2017) Toward a conceptual framework for early brain and behavior  
619 development in Autism. *Mol Psychiatry* 22:1–10.
- 620 Power JD, Mitra A, Laumann TO, Snyder AZ, Schlaggar BL, Petersen SE (2014a) Methods to detect,  
621 characterize, and remove motion artifact in resting state fMRI. *Neuroimage* 84:320–341  
622 Available at: <http://dx.doi.org/10.1016/j.neuroimage.2013.08.048>.
- 623 Power JD, Schlaggar BL, Petersen SE (2014b) Studying brain organization via spontaneous fMRI  
624 signal. *Neuron* 84:681–696 Available at: <http://dx.doi.org/10.1016/j.neuron.2014.09.007>.
- 625 Rogers EJ, Jada R, Schragenheim-Rozales K, Sah M, Cortes M, Florence M, Levy NS, Moss R,  
626 Walikonis RS, Palty R, Shalgi R, Lichtman D, Kavushansky A, Gerges NZ, Kahn I, Umanah  
627 GKE, Levy AP (2019) An IQSEC2 Mutation Associated With Intellectual Disability and Autism  
628 Results in Decreased Surface AMPA Receptors. *Front Mol Neurosci* 12:1–18 Available at:  
629 <https://www.frontiersin.org/article/10.3389/fnmol.2019.00043/full>.
- 630 Scott-Van Zeeland AA, Abrahams BS, Alvarez-Retuerto AI, Sonnenblick LI, Rudie JD, Ghahremani  
631 D, Mumford JA, Poldrack RA, Dapretto M, Geschwind DH, Bookheimer SY (2010) Altered  
632 functional connectivity in frontal lobe circuits is associated with variation in the autism risk gene  
633 CNTNAP. *Sci Transl Med* 2.
- 634 Seo S (2006) A review and comparison of methods for detecting outliers in univariate data sets. *Dep*  
635 *Biostat Grad Sch Public Heal*.
- 636 Shofty B, Bergmann E, Zur G, Asleh J, Bosak N, Kavushansky A, Castellanos FX, Ben-Sira L,  
637 Packer RJ, Vezina GL, Constantini S, Acosta MT, Kahn I (2019) Autism-associated Nf1  
638 deficiency disrupts corticocortical and corticostriatal functional connectivity in human and  
639 mouse. *Neurobiol Dis* 130:104479 Available at: <https://doi.org/10.1016/j.nbd.2019.104479>.
- 640 Shoubridge C et al. (2010) Mutations in the guanine nucleotide exchange factor gene IQSEC2 cause  
641 nonsyndromic intellectual disability. *Nat Genet* 42:486–488.
- 642 Stafford JM, Jarrett BR, Miranda-Dominguez O, Mills BD, Cain N, Mihalas S, Lahvis GP, Lattal  
643 KM, Mitchell SH, David S V., Fryer JD, Nigg JT, Fair DA (2014) Large-scale topology and the  
644 default mode network in the mouse connectome. *Proc Natl Acad Sci U S A* 111:18745–18750.

- 645 Takata A et al. (2018) Integrative Analyses of De Novo Mutations Provide Deeper Biological Insights  
646 into Autism Spectrum Disorder. *Cell Rep* 22:734–747 Available at:  
647 <https://doi.org/10.1016/j.celrep.2017.12.074>.
- 648 The jamovi project (2020) The jamovi project (2020). jamovi.
- 649 Ullman MT, Pullman MY (2015) A compensatory role for declarative memory in  
650 neurodevelopmental disorders. *Neurosci Biobehav Rev* 51:205–222.
- 651 Vasa RA, Mostofsky SH, Ewen JB (2016) The Disrupted Connectivity Hypothesis of Autism  
652 Spectrum Disorders: Time for the Next Phase in Research. *Biol Psychiatry Cogn Neurosci*  
653 *Neuroimaging* 1:245–252 Available at: <http://dx.doi.org/10.1016/j.bpsc.2016.02.003>.
- 654 Wang W, Li C, Chen Q, Van Der Goes MS, Hawrot J, Yao AY, Gao X, Lu C, Zang Y, Zhang Q,  
655 Lyman K, Wang D, Guo B, Wu S, Gerfen CR, Fu Z, Feng G (2017) Striatopallidal dysfunction  
656 underlies repetitive behavior in Shank3-deficient model of autism. *J Clin Invest* 127:1978–1990.
- 657 Zerbi V, Grandjean J, Rudin M, Wenderoth N (2015) Mapping the mouse brain with rs-fMRI: An  
658 optimized pipeline for functional network identification. *Neuroimage* 123:11–21 Available at:  
659 <http://dx.doi.org/10.1016/j.neuroimage.2015.07.090>.
- 660 Zipper R, Baine SD, Genizi J, Maoz H, Levy NS, Levy AP (2017) Developmental progression of  
661 intellectual disability, autism, and epilepsy in a child with an IQSEC2 gene mutation. *Clin Case*  
662 *Reports* 5:1639–1643.
